# Supplementary material for: Intraflagellar transport protein IFT172 contains a C-terminal ubiquitin-binding U-box-like domain involved in ciliary signaling
Source: eLife journal article supplement (doi:10.7554/elife.104906), 2025-01-31
Supplement: fig1-figsupp1-data1 [file Figure 1 - figure supplement 1 source data 1.pdf › Figure 1-figure supplement 1-source data 1/Figure 1 - figure supplement 1 source data 1.pdf]

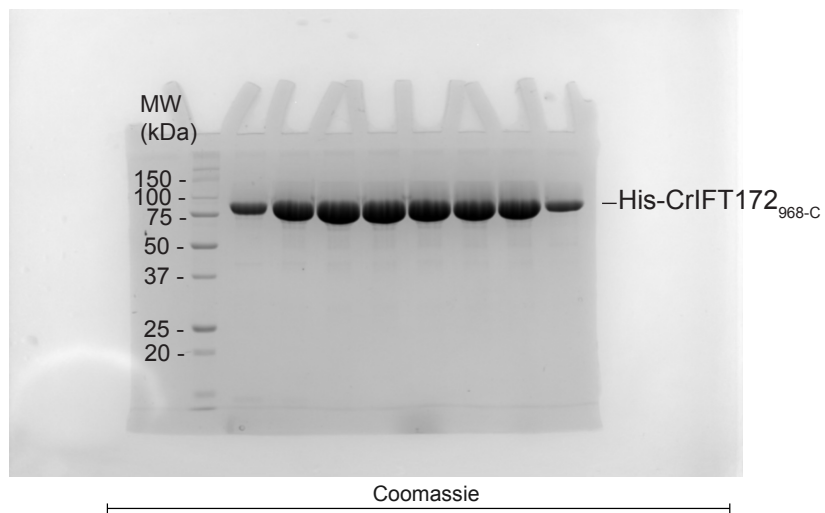

Original coomassie staining gel used to generate Figure 1 - figure supplement 1, panel A, labelled according to the original figure panel.
