# Supplementary material for: Intraflagellar transport protein IFT172 contains a C-terminal ubiquitin-binding U-box-like domain involved in ciliary signaling
Source: eLife journal article supplement (doi:10.7554/elife.104906), 2025-01-31
Supplement: fig3-data1 [file Fig 3 source data 1.pdf › Figure 3-source data 1/Fig 3 source data 1.pdf]

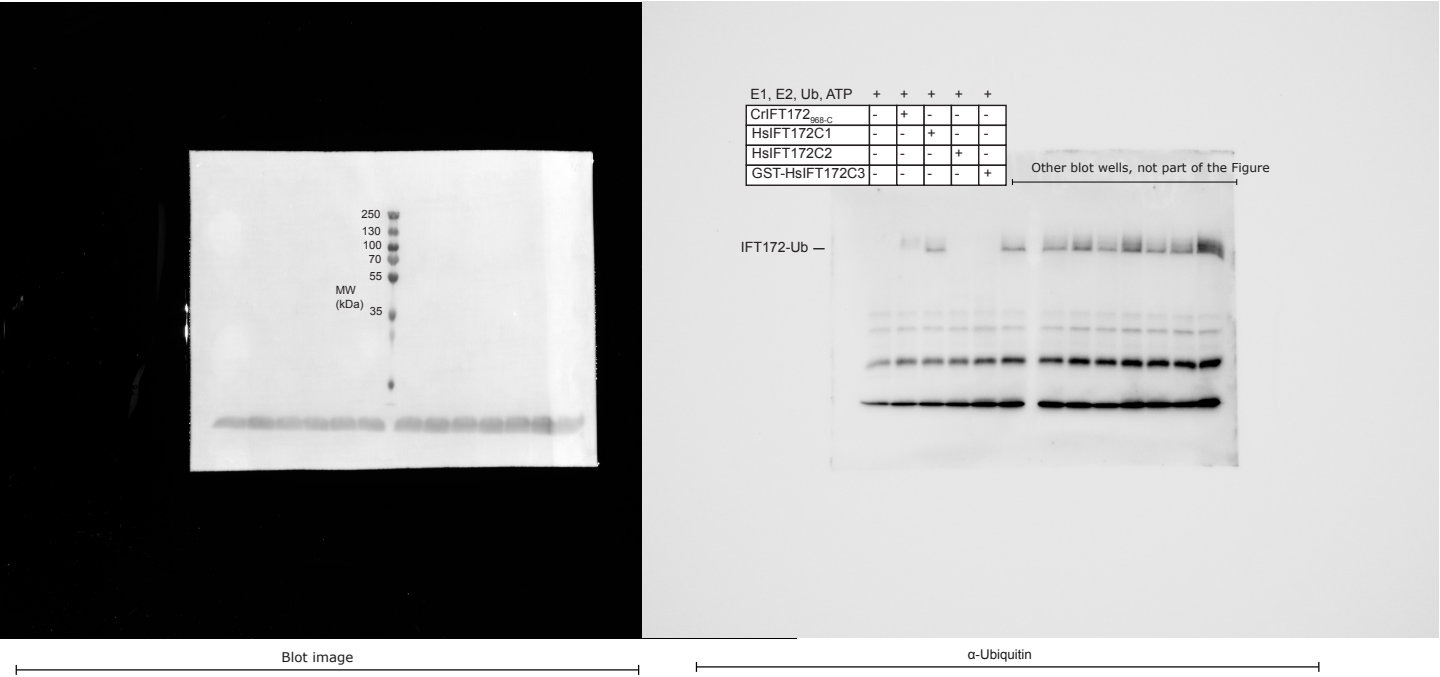

Original blot images and α-Ubiquitin blots used to generate Figure 3, panel A, labelled according to the original figure panel.

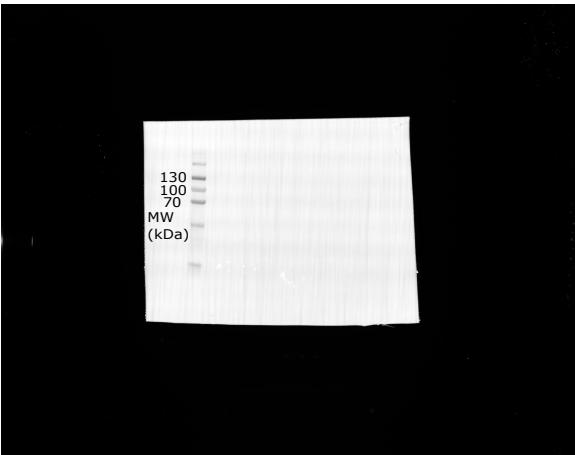

Blot image

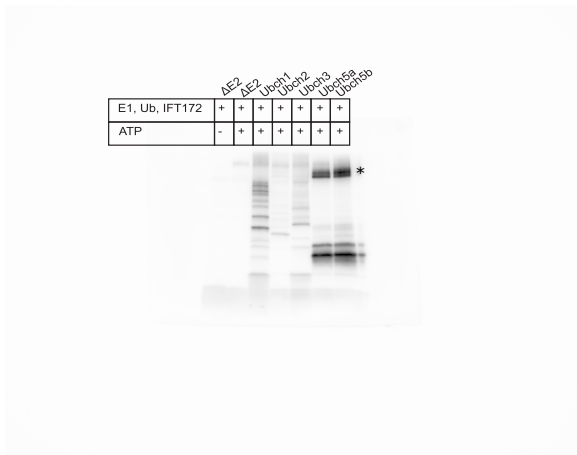

α-Ubiquitin

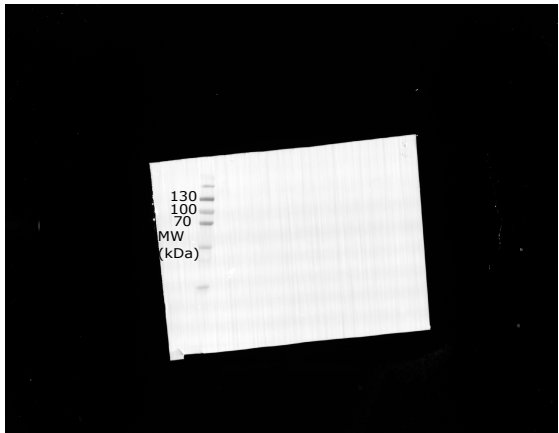

Blot image

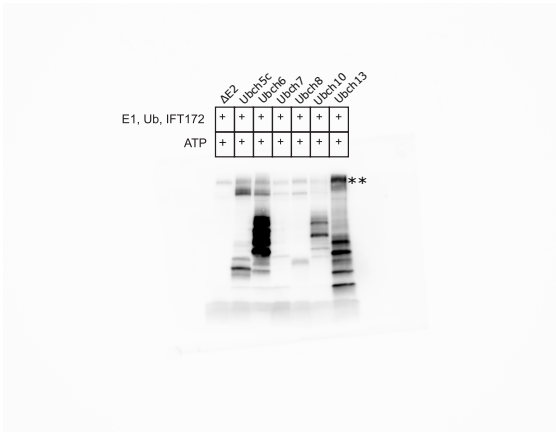

α-Ubiquitin

\* Putative IFT172-Ub conjugates  
 \*\* Ube1~Ub reaction intermediate

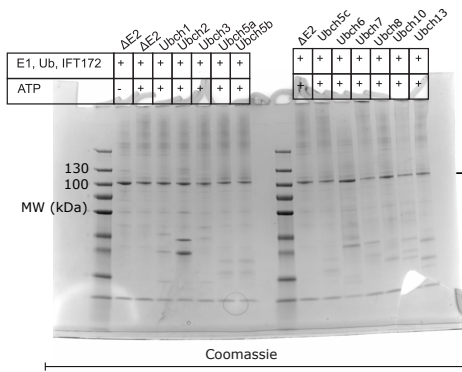

Coomassie

-HsIFT172C1

Original blot images, α-Ubiquitin blots and coomassie stainings used to generate Figure 3, panel B, labelled according to the original figure panel.

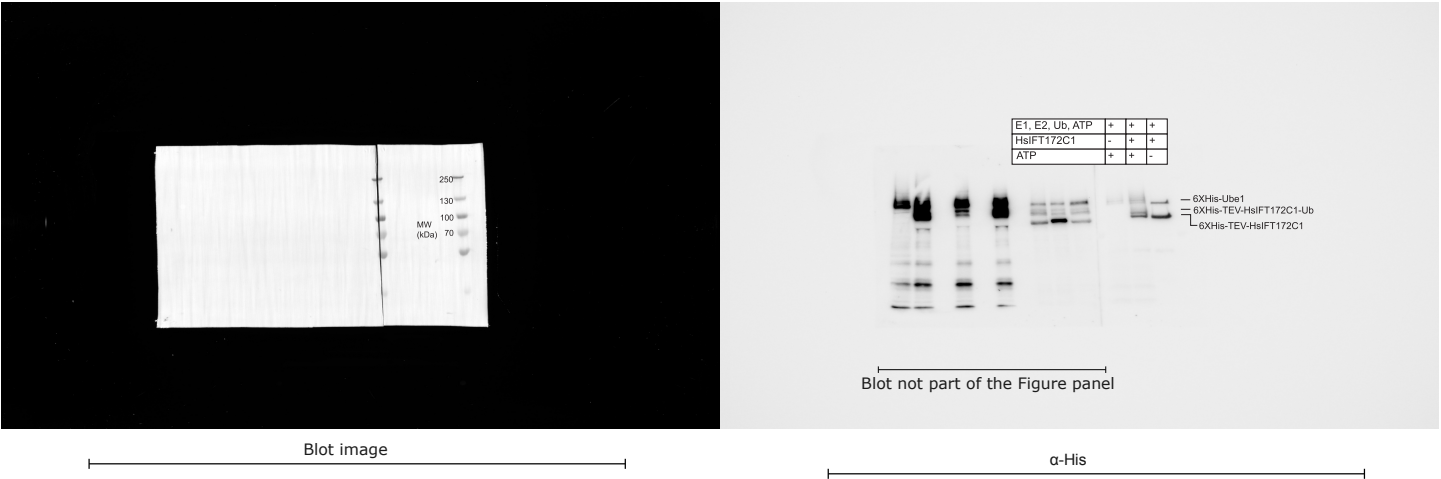

Original blot images and  $\alpha$ -His blots used to generate Figure 3, panel C, labelled according to the original figure panel.

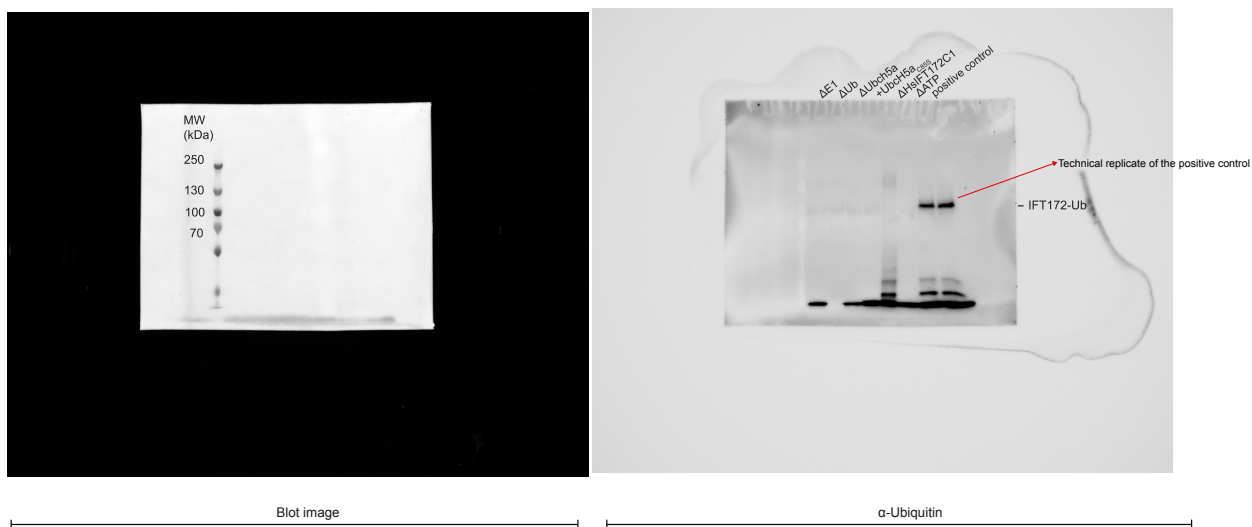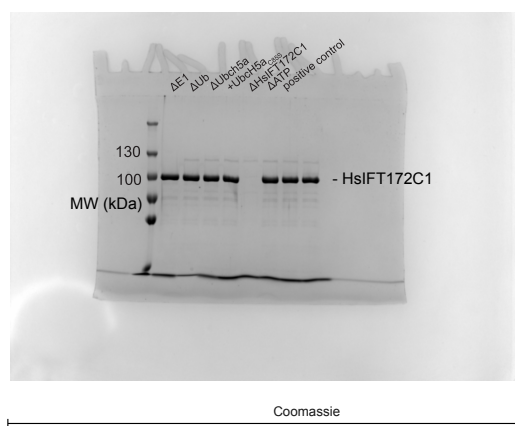

Original blot images, α-Ubiquitin blots and coomassie stainings used to generate Figure 3, panel D, labelled according to the original figure panel.



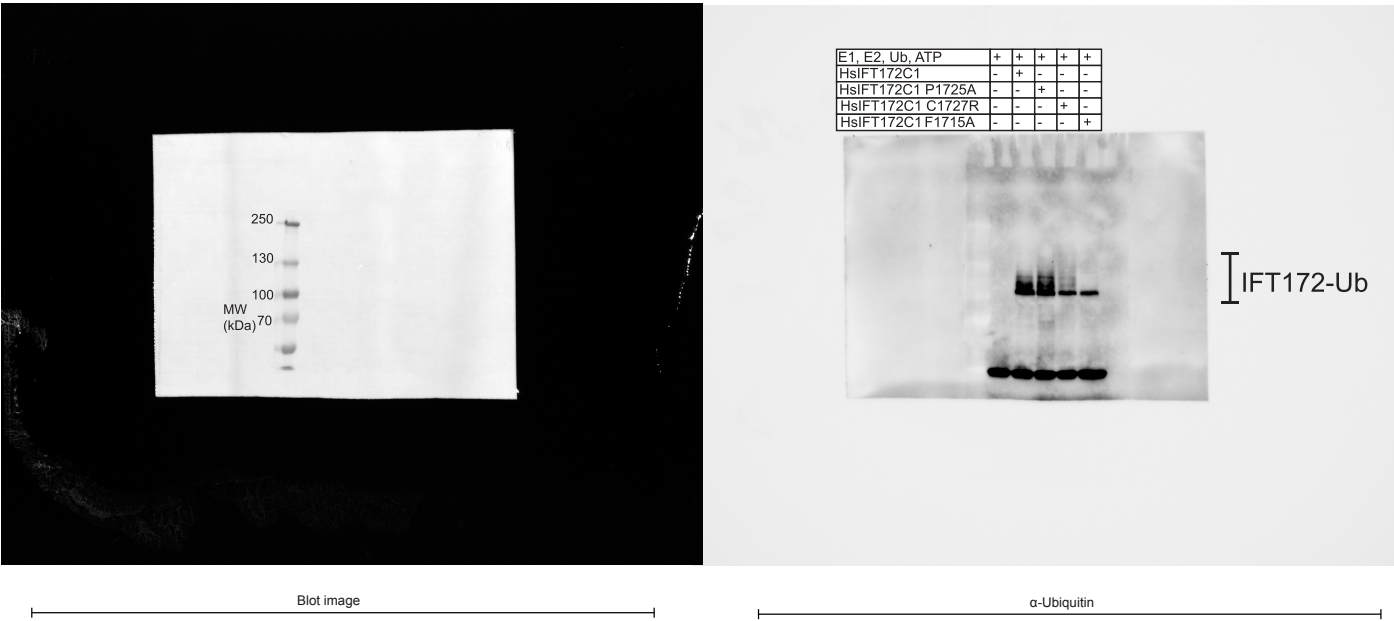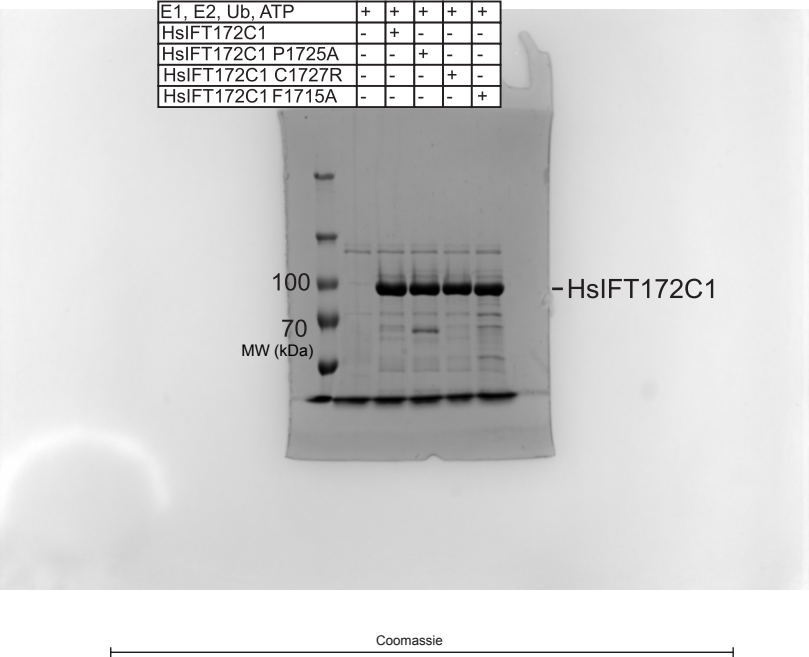

Original blot images, α-Ubiquitin blots and coomassie stainings used to generate Figure 3, panel F, labelled according to the original figure panel.
