# Supplementary material for: Intraflagellar transport protein IFT172 contains a C-terminal ubiquitin-binding U-box-like domain involved in ciliary signaling
Source: eLife journal article supplement (doi:10.7554/elife.104906), 2025-01-31
Supplement: fig3-figsupp1-data1 [file Figure 3 - figure supplement 1 Source data 1.pdf › Figure 3-figure supplement 1-source data 1/Figure 3 - figure supplement 1 Source data 1.pdf]

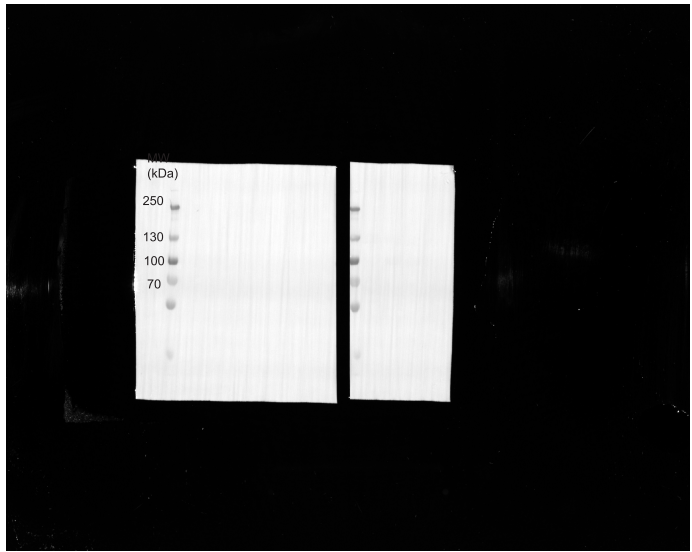

Blot image

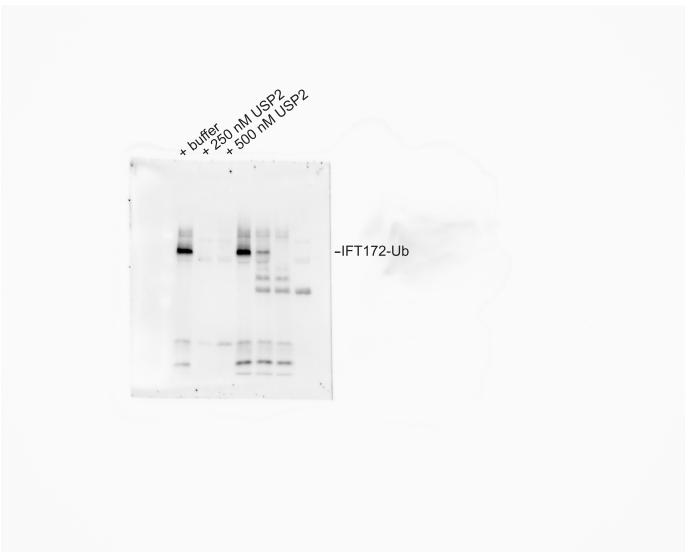

$\alpha$ -Ubiquitin

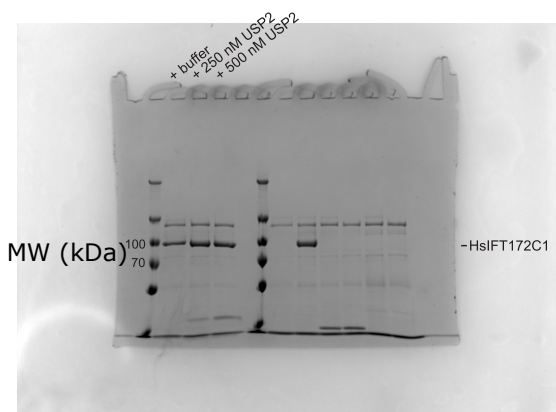

Coomassie

Original blot images,  $\alpha$ -Ubiquitin blots and coomassie stainings used to generate Figure 3 - figure supplement 1, panel A, labelled according to the original figure panel.

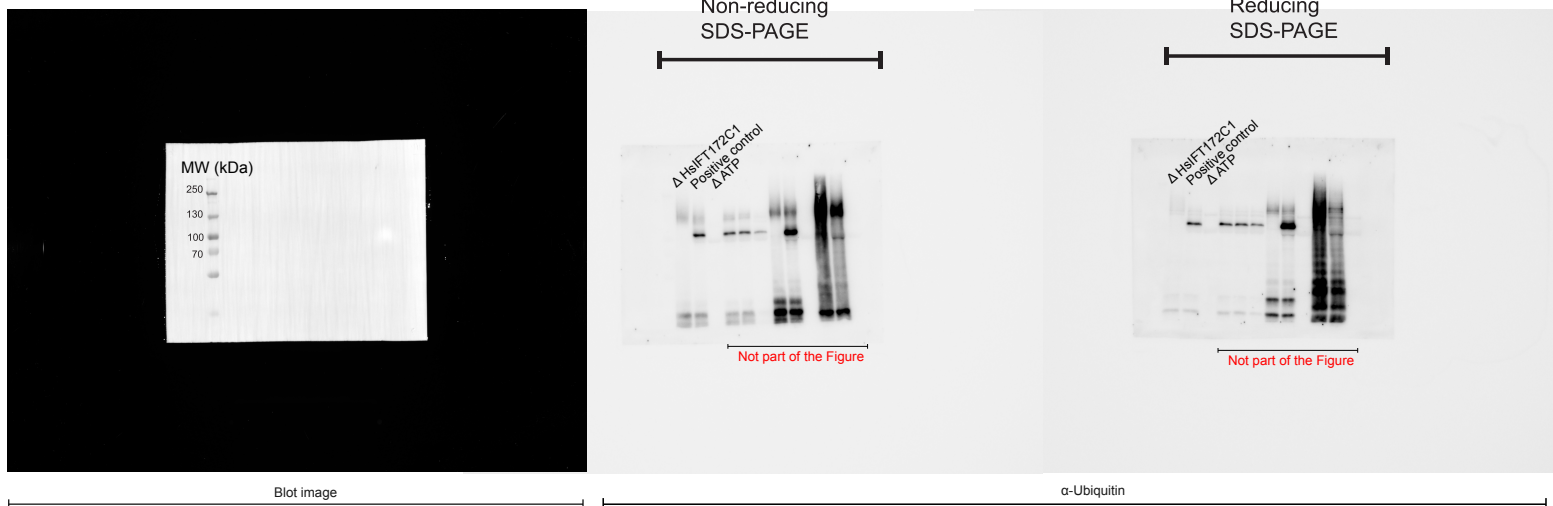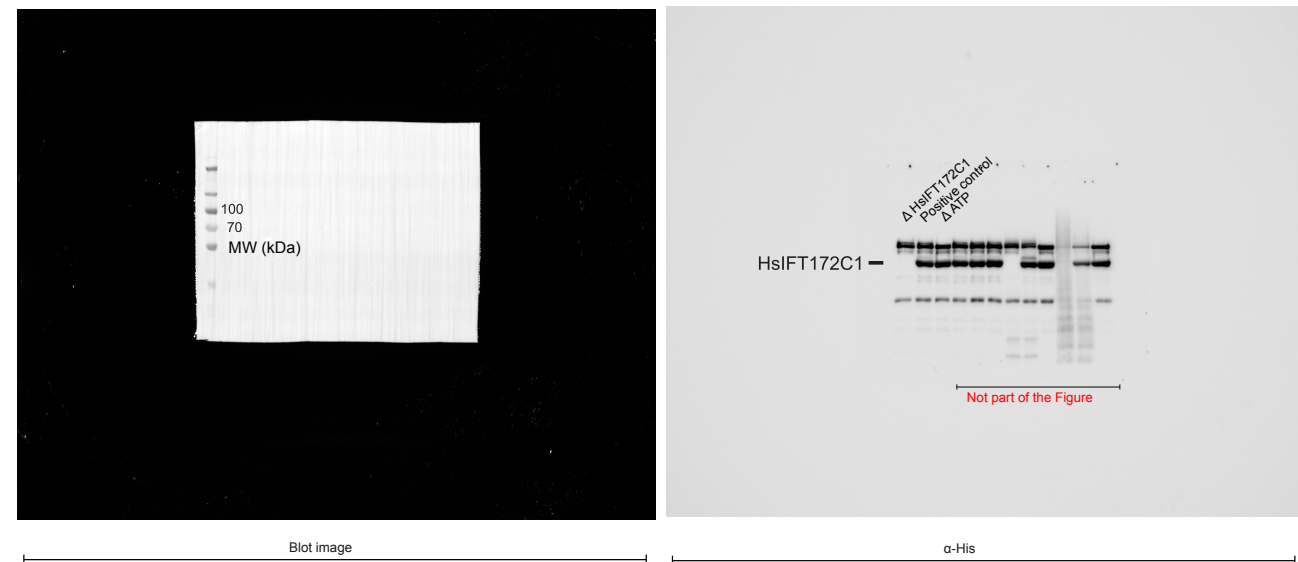

Original blot images, α-Ubiquitin blots and α-His blots used to generate Figure 3 - figure supplement 1, panel B, labelled according to the original figure panel.

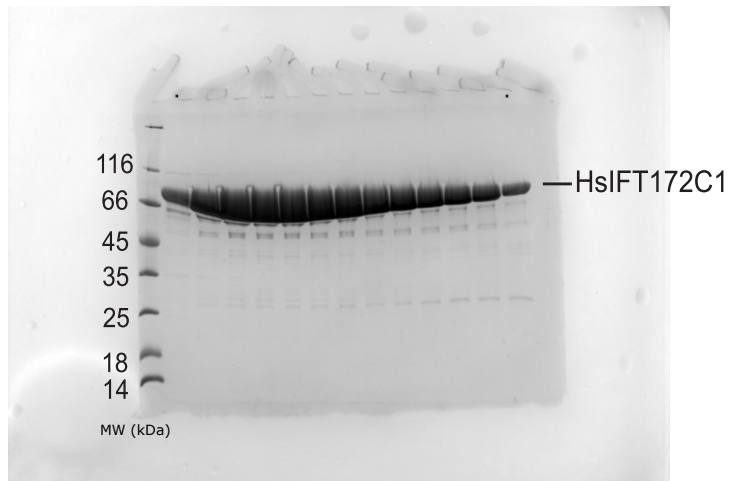

Coomassie Panel C

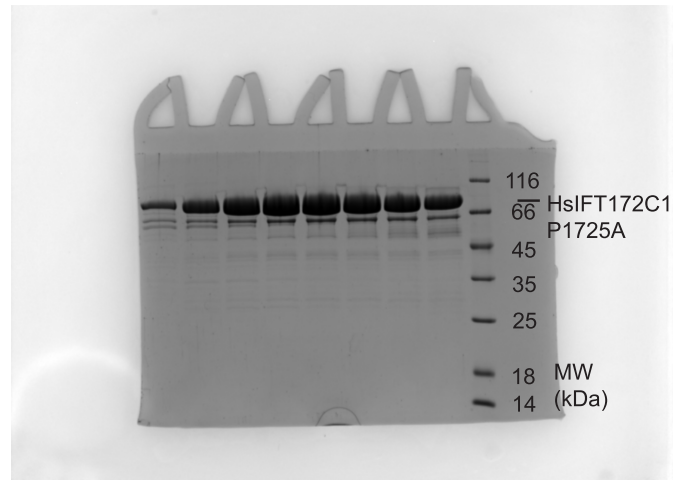

Coomassie Panel D

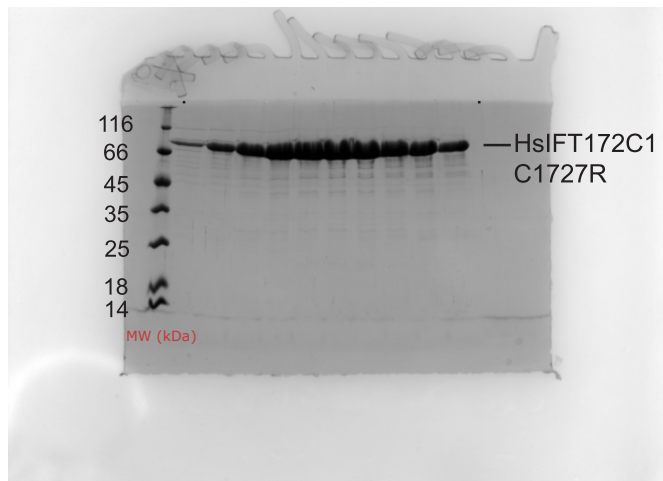

Coomassie Panel E

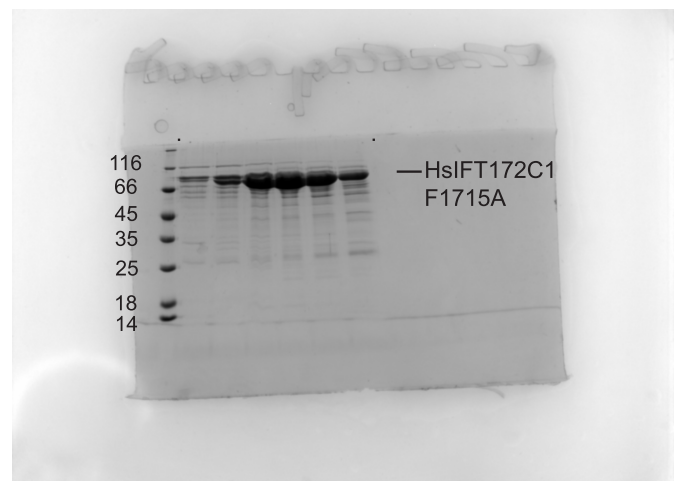

Coomassie Panel F

Original coomassie staining gels used to generate Figure 3 - figure supplement 1, panel C-F, labelled according to the original figure panels.
