# Supplementary material for: Intraflagellar transport protein IFT172 contains a C-terminal ubiquitin-binding U-box-like domain involved in ciliary signaling
Source: eLife journal article supplement (doi:10.7554/elife.104906), 2025-01-31
Supplement: fig4-data1 [file Figure 4 source data 1.pdf › Figure 4-source data 1/Figure 4 source data 1.pdf]

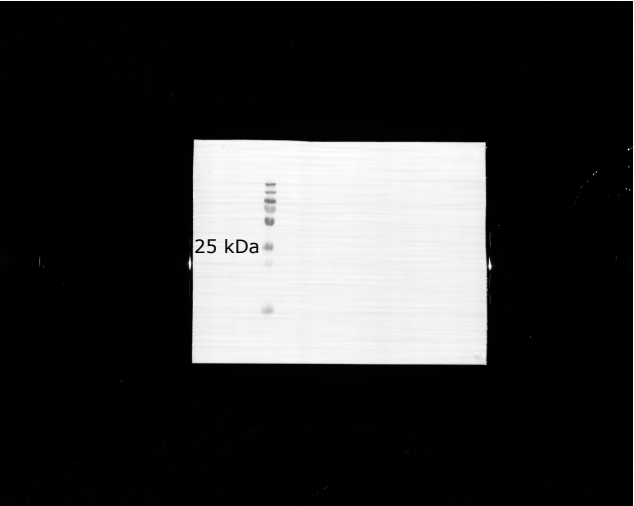

Blot image

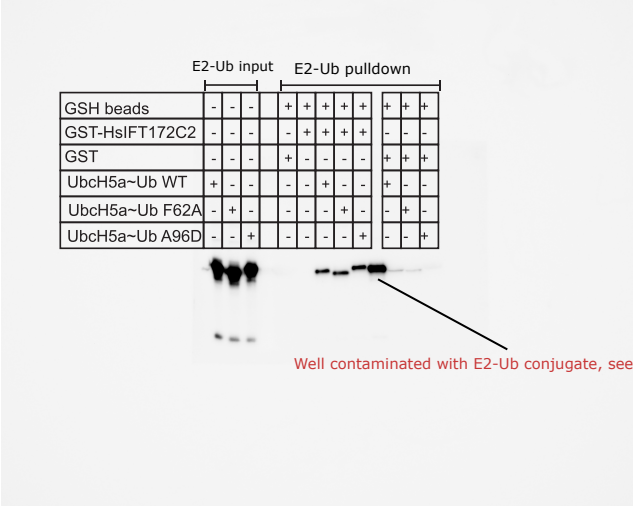

$\alpha$ -Ubiquitin

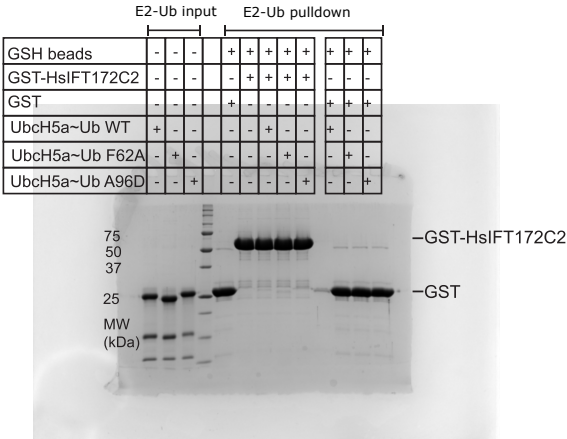

Coomassie

Original blot images,  $\alpha$ -Ubiquitin blots and coomassie stainings used to generate Figure 4, panel A, labelled according to the original figure panel.

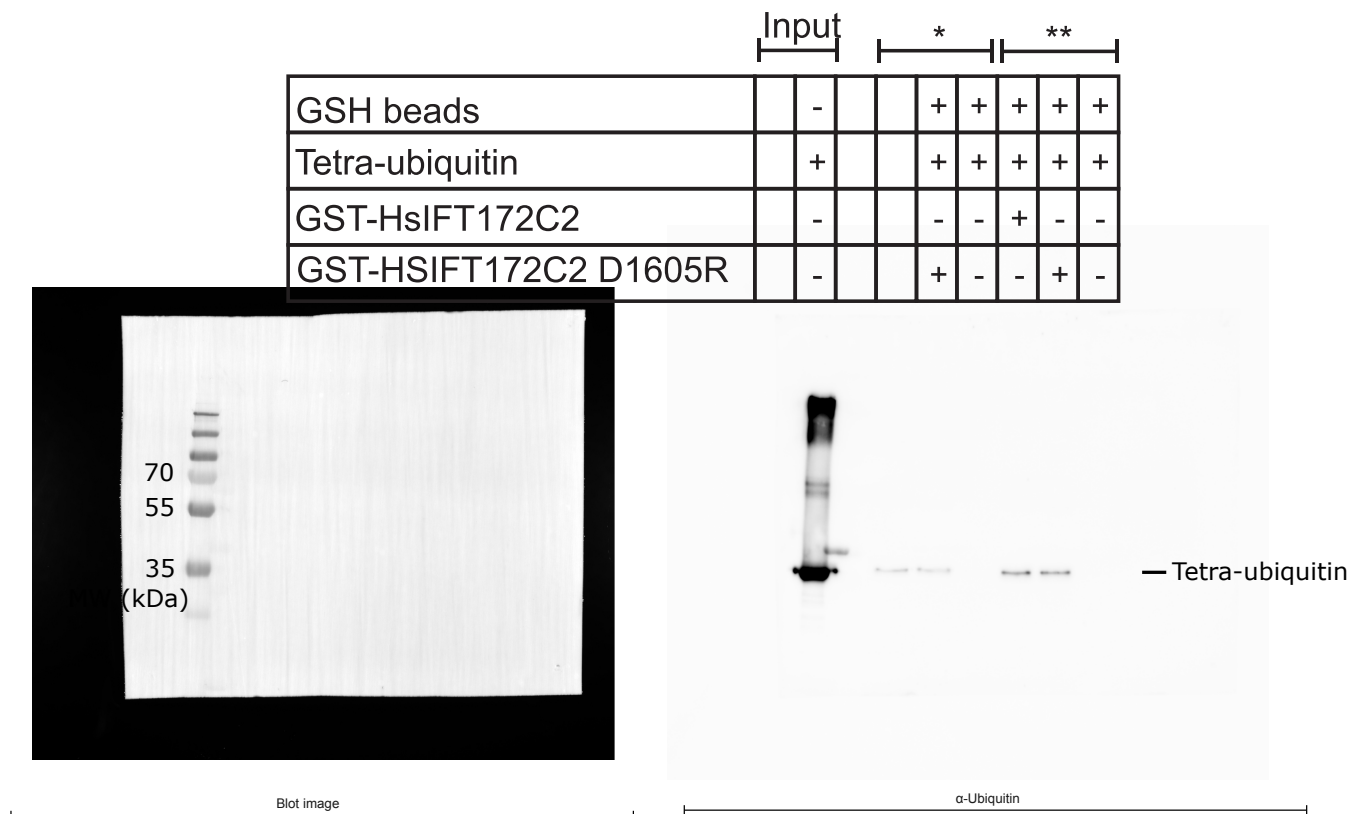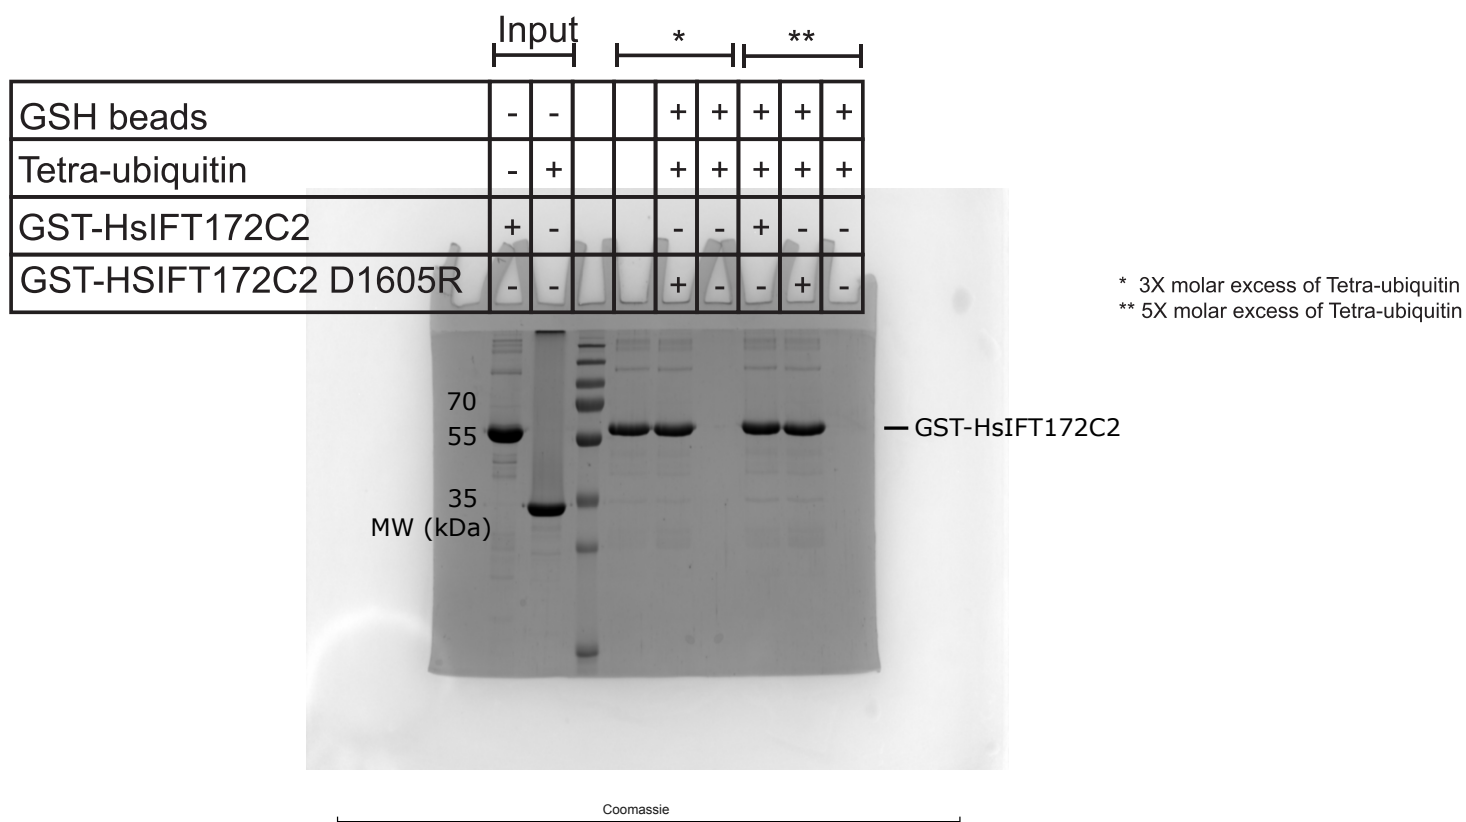

Original blot images, α-Ubiquitin blots and coomassie stainings used to generate Figure 4, panel C, labelled according to the original figure panel.

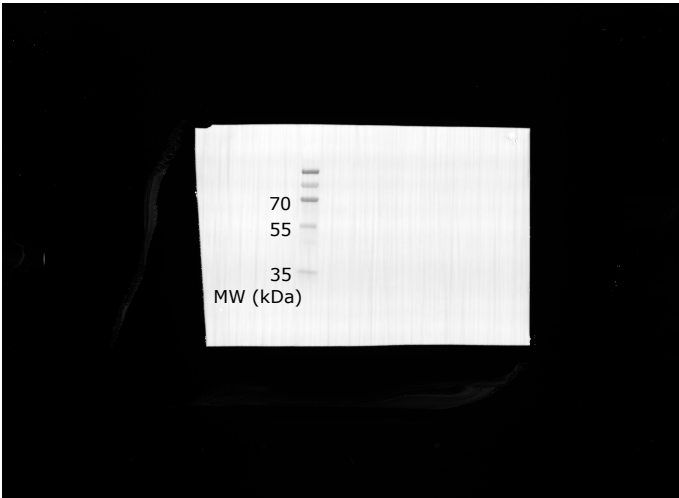

Blot image

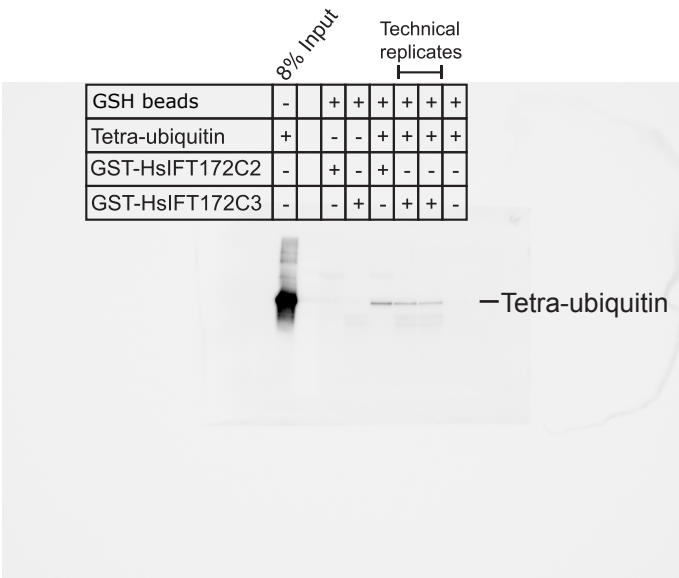

α-Ubiquitin

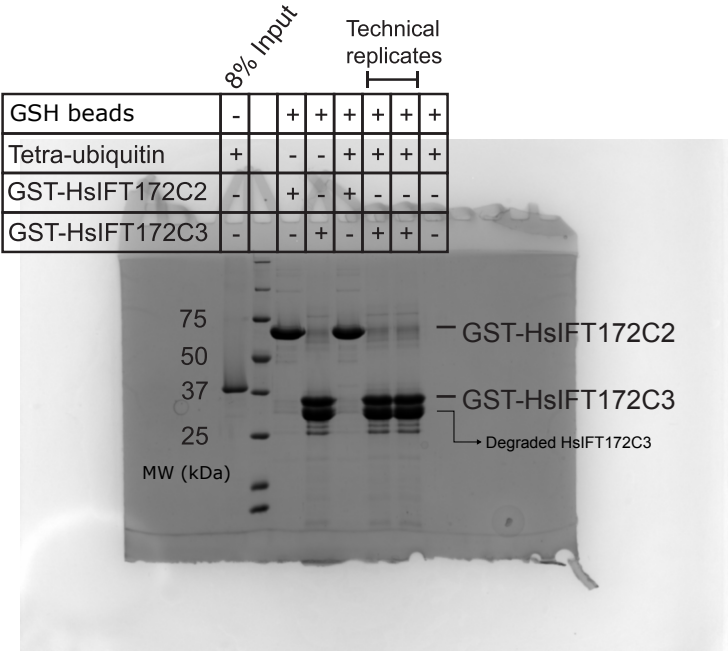

Coomassie

Original blot images, α-Ubiquitin blots and coomassie stainings used to generate Figure 4, panel D, labelled according to the original figure panel.
