# Supplementary material for: Intraflagellar transport protein IFT172 contains a C-terminal ubiquitin-binding U-box-like domain involved in ciliary signaling
Source: eLife journal article supplement (doi:10.7554/elife.104906), 2025-01-31
Supplement: fig4-figsupp1-data1 [file Figure 4- figure supplement 1 source data 1.pdf › Figure 4-figure supplement 1-source data 1/Figure 4- figure supplement 1 source data 1.pdf]

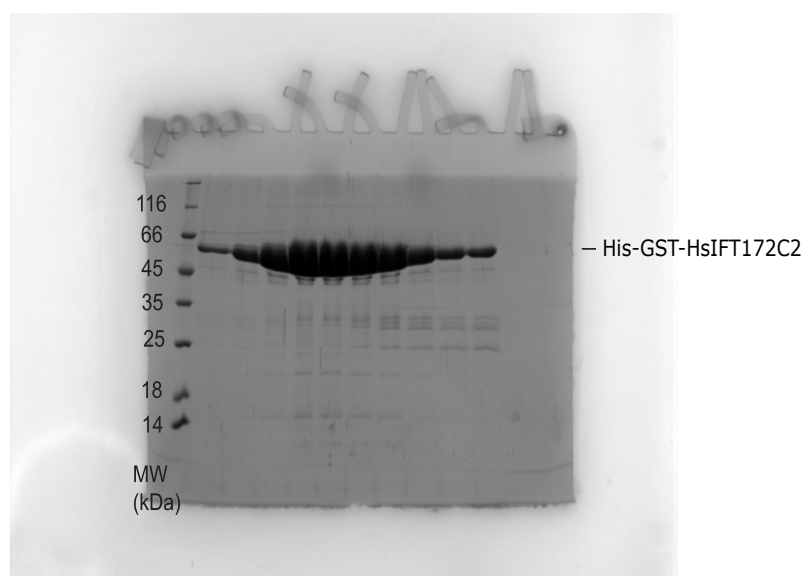

Coomassie Panel A

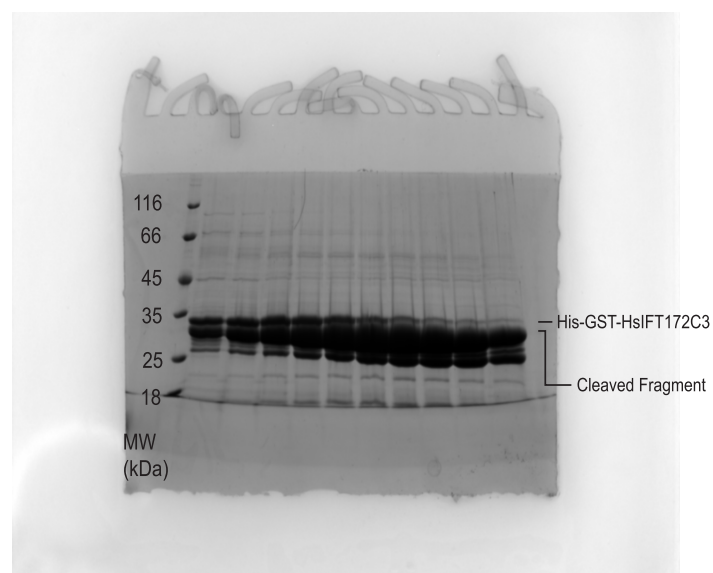

Coomassie Panel B

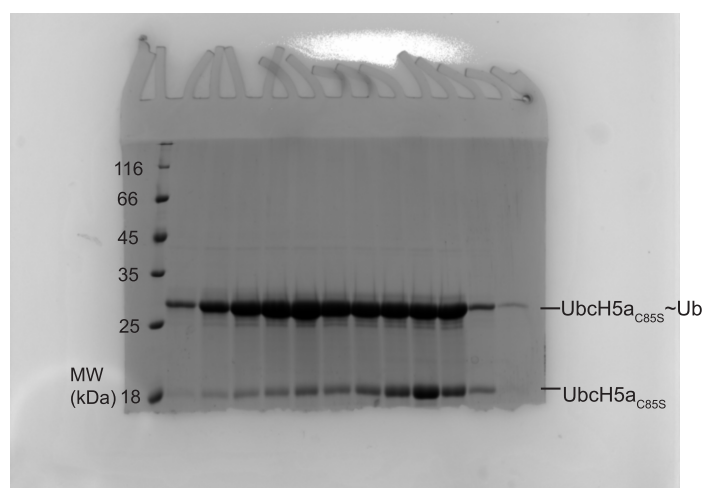

Coomassie Panel C

Original coomassie staining gels used to generate Figure 4 - figure supplement 1, panel A-C, labelled according to the original figure panel.
