# Supplementary material for: Intraflagellar transport protein IFT172 contains a C-terminal ubiquitin-binding U-box-like domain involved in ciliary signaling
Source: eLife journal article supplement (doi:10.7554/elife.104906), 2025-01-31
Supplement: fig5-data1 [file Figure 5 source data 1.pdf › Figure 5-source data 1/Figure 5 source data 1.pdf]

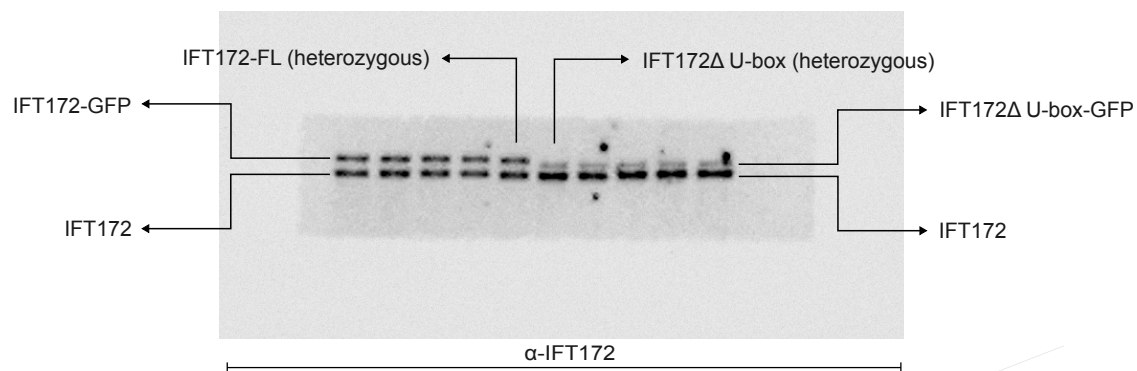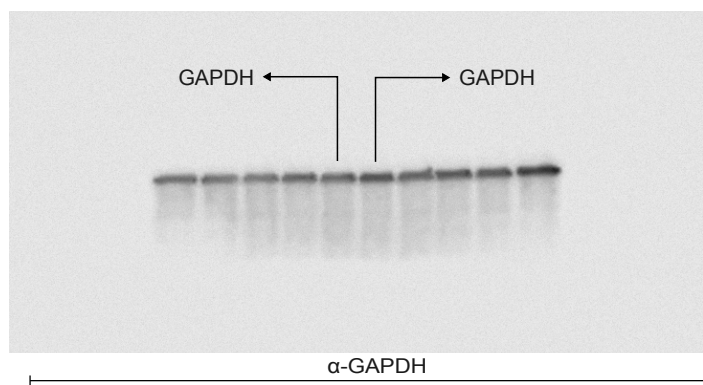

Original western blot acquisitions used to generate Figure 5, panel D, labelled according to the original figure panel. The marked wells and the remaining wells are part of a TGF- $\beta$ 1 stimulation time course assay in the two respective cell lines.

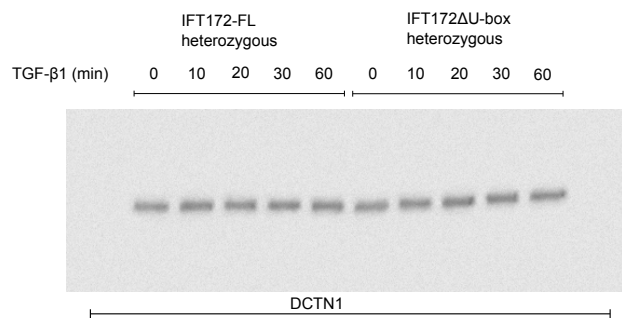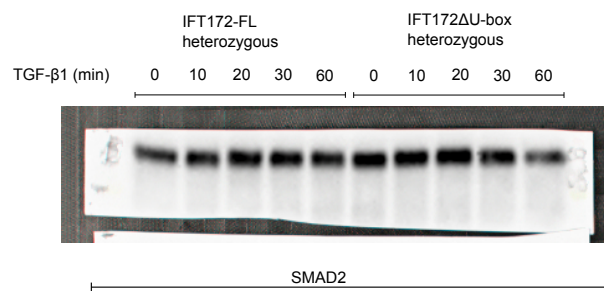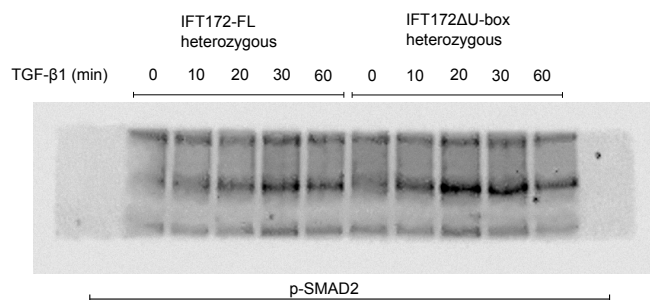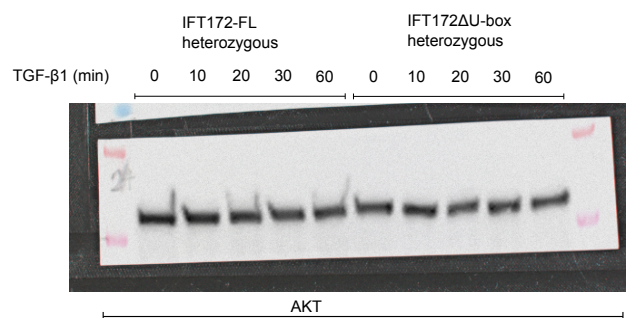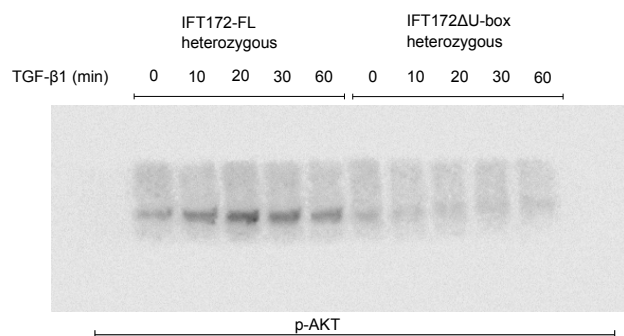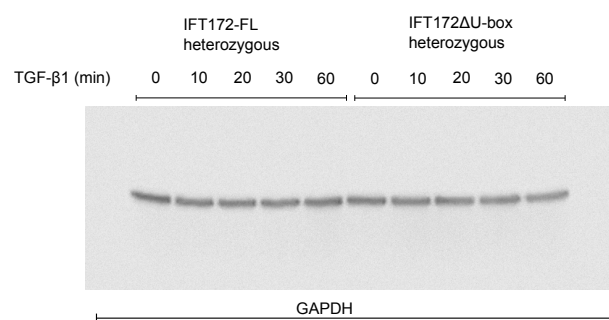

Original western blot acquisitions used to generate Figure 5, panel E, labelled according to the original figure panel.
