# Supplementary figures and images for: Intraflagellar transport protein IFT172 contains a C-terminal ubiquitin-binding U-box-like domain involved in ciliary signaling
Source: eLife journal article supplement (doi:10.7554/elife.104906), 2025-01-31

Figure 5-figure supplement 2-source data 1

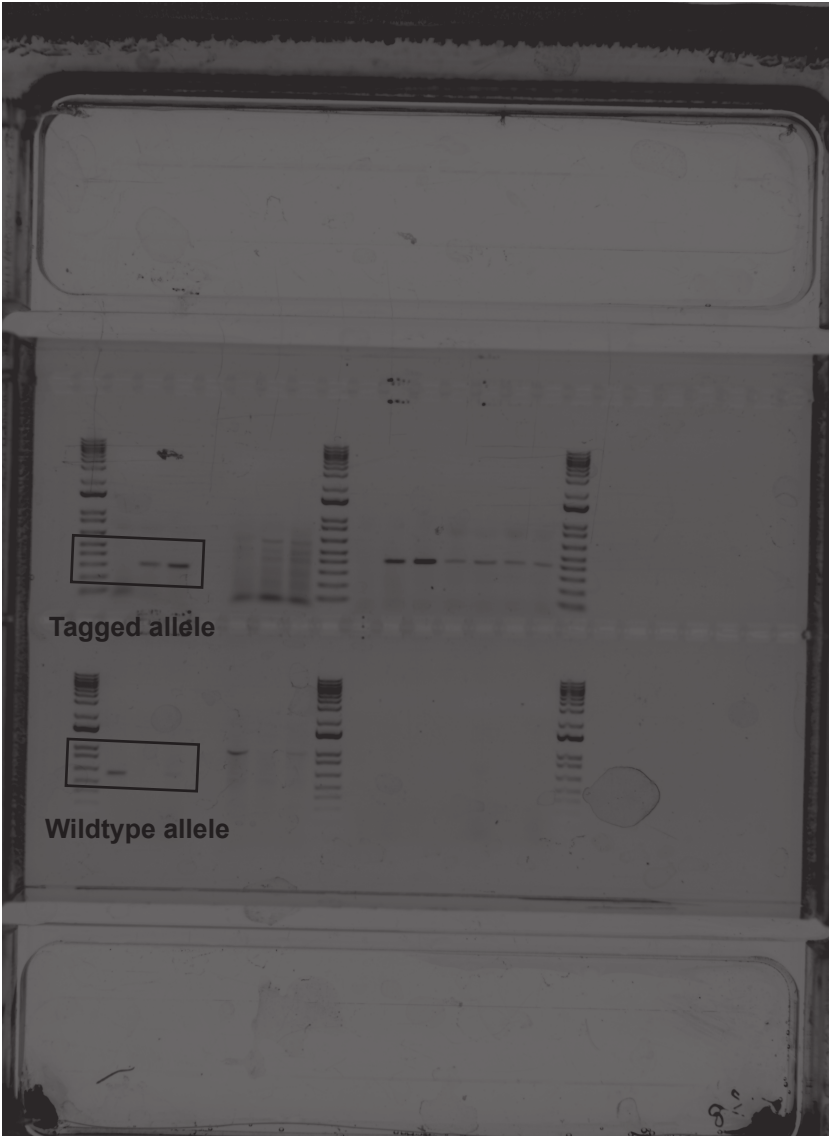

Supplement: fig5-figsupp2-data1 [file Figure 5-figure supplement 2-source data 1.pdf › Figure 5-figure supplement 2-source data 1/Figure 5-figure supplement 2-source data 1.pdf]

Figure 5-figure supplement 3-source data 1

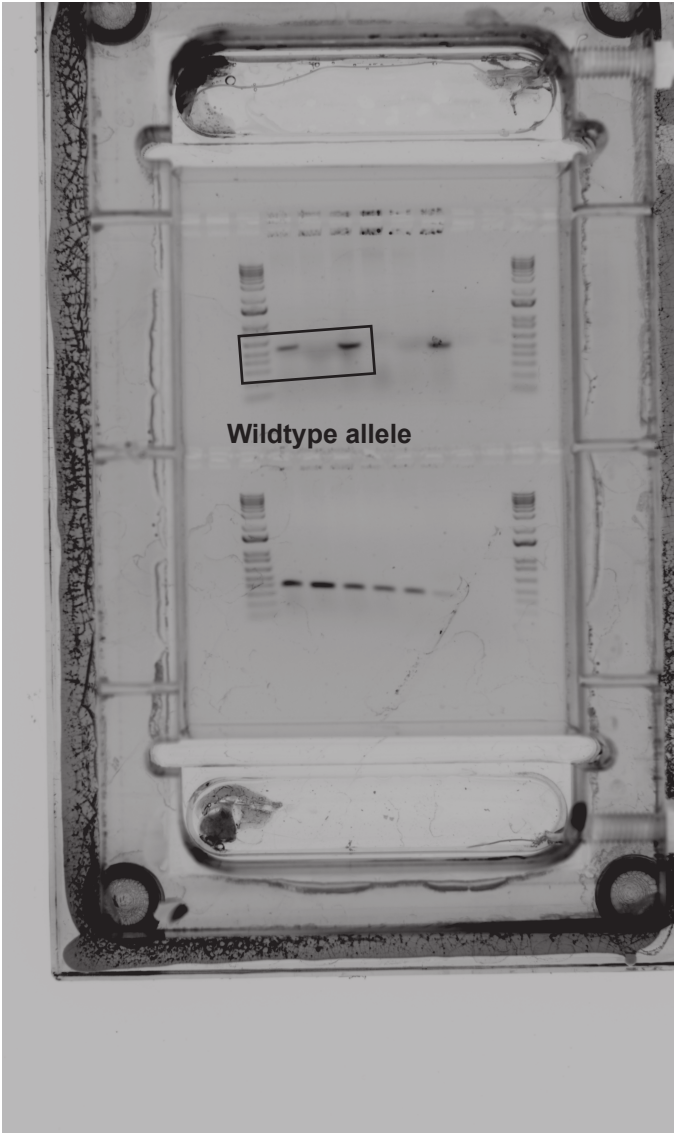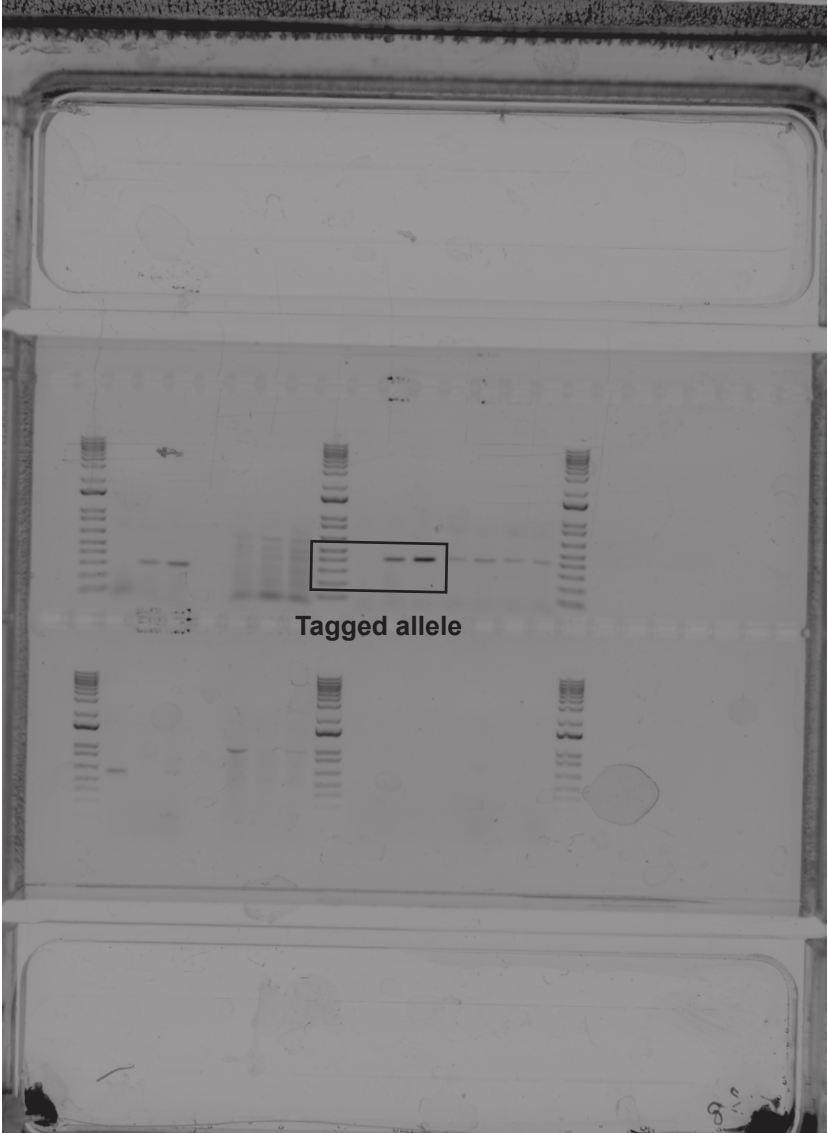

Supplement: fig5-figsupp3-data1 [file Figure 5-figure supplement 3-source data 1.pdf › Figure 5-figure supplement 3-source data 1/Figure 5-figure supplement 3-source data 1.pdf]

Figure 5-figure supplement 4-source data 1

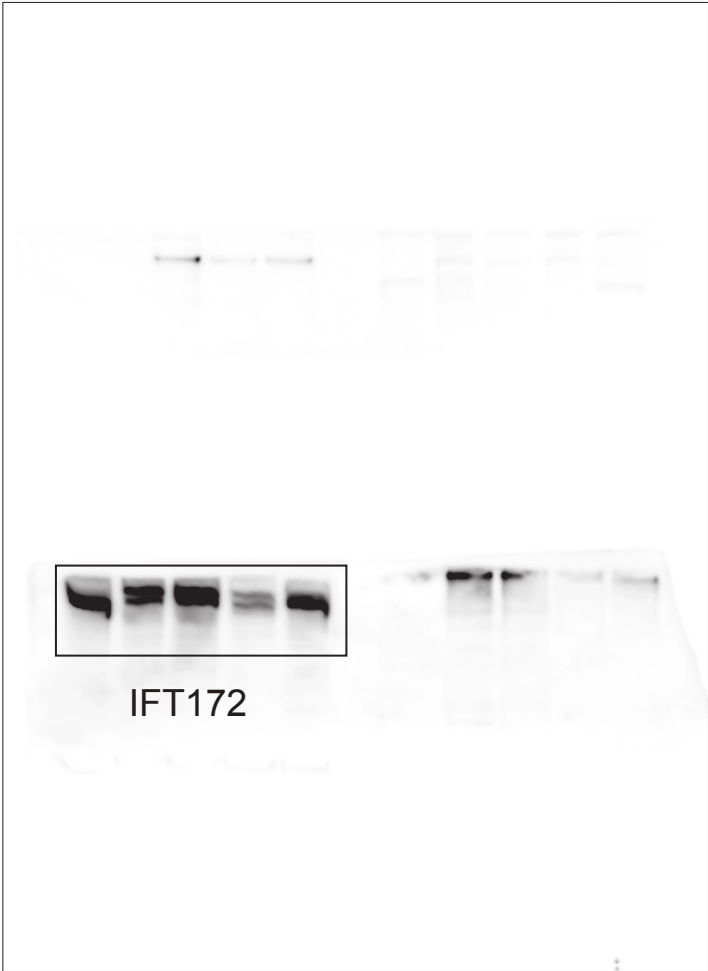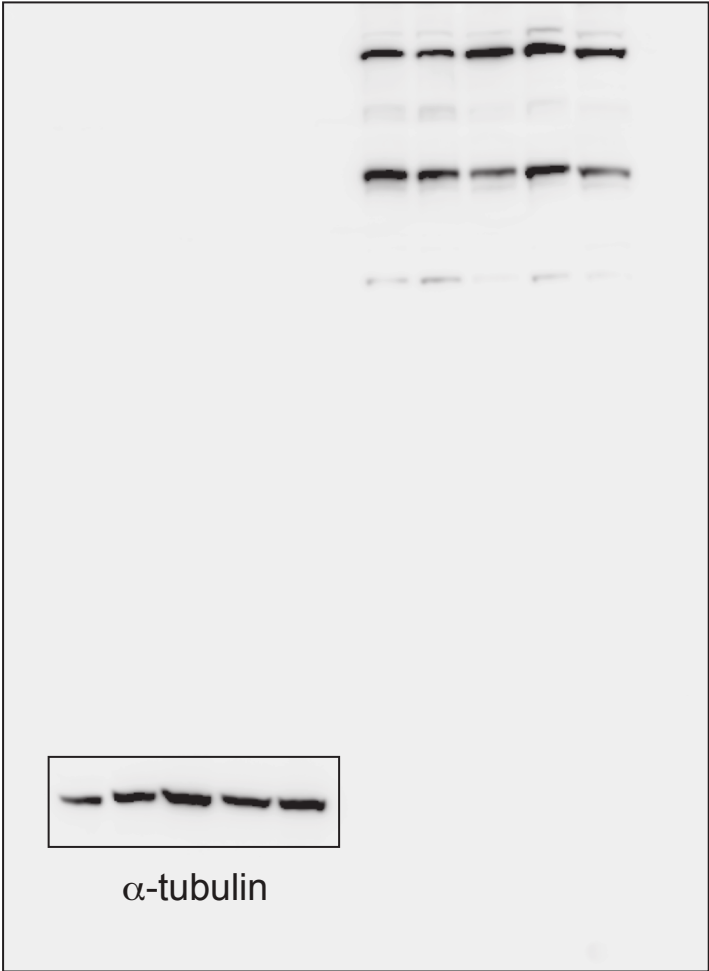

Supplement: fig5-figsupp4-data1 [file Figure 5-figure supplement 4-source data 1.pdf › Figure 5-figure supplement 4-source data 1/Figure 5-figure supplement 4-source data 1.pdf]
